# Supplementary material
Source: publisher site journal article supplement (https://www.dovepress.com/article/128849)
Supplement: Supplementary file 1 [file get_supplementary_file.php]

**Supplementary Table 1** Characteristics of the studies included in the meta-analysis

| Study                        | Design                              | Location           | Age      | Gender | No. of participants | No. of cases | Lymphoma | Allergic information source                            | Adjusted factors                                                                                                                                        |
|------------------------------|-------------------------------------|--------------------|----------|--------|---------------------|--------------|----------|--------------------------------------------------------|---------------------------------------------------------------------------------------------------------------------------------------------------------|
| Wang/2015 <sup>4</sup>       | Population-based case-control       | USA                | All ages | M/F    | 324                 | 162          | NHL      | Self-report history of allergies, and atopic diseases  | None                                                                                                                                                    |
| Liu/2015 <sup>8</sup>        | Registry-based retrospective cohort | Sweden             | 2-74     | M/F    | 439455              | 363          | NHL HL   | Medical record of asthma                               | None                                                                                                                                                    |
| Hollander/2015 <sup>13</sup> | Population-based case-control       | Denmark and Sweden | 18-74    | M/F    | 3772                | 585          | HL       | Self-report history of atopic disorders and            | Age, sex, country, smoking, number of siblings, history of infectious mononucleosis, mother's age at participant's birth, maternal socioeconomic status |
| Hofmann/2015 <sup>9</sup>    | Prospective population-based cohort | USA                | Nr       | M/F    | 82370               | 710          | NHL      | Self-report of allergic symptoms and history of atopic | Age, sex, state of residence, race, family history of lymphohematopoietic cancer, alcohol                                                               |

|                             |                                             |                    |            |     |        |     |        |                                                         |                                                                                                             |
|-----------------------------|---------------------------------------------|--------------------|------------|-----|--------|-----|--------|---------------------------------------------------------|-------------------------------------------------------------------------------------------------------------|
|                             |                                             |                    |            |     |        |     |        | conditions (hay fever, eczema) diagnosed by a physician | consumption, smoking, and BMI                                                                               |
| Helby/2015 <sup>14</sup>    | Prospective population-based cohort         | Denmark            | 48-67      | M/F | 37747  | 53  | NHL HL | Plasma IgE level                                        | Age, sex, BMI, alcohol, smoking status, cumulative smoking in pack-years, duration of schooling, and income |
| Hemminki/2014 <sup>18</sup> | Register-based retrospective cohort         | Sweden             | Median: 24 | M/F | 138723 | 102 | NHL    | Medically diagnosed hay fever and allergic rhinitis     | None                                                                                                        |
| Nieters/2014 <sup>15</sup>  | Nested case-control with prospective cohort | European countries | Nr         | M/F | 2040   | 870 | NHL    | Plasma IgE level                                        | Sex, smoking status, alcohol consumption at recruitment and highest school level                            |
| Linabery/2014 <sup>16</sup> | Prospective population-based cohort         | USA                | 55-69      | F   | 22601  | 327 | NHL    | Self-report of allergic conditions told by doctor       | Age, education, BMI, smoking status, and residence                                                          |
| Linabery/2014 <sup>17</sup> | Population-based                            | USA and            | Mostly     | M/F | 1301   | 517 | HL     | Parental                                                | Household income                                                                                            |

|                             |                                     |        |              |     |           |      |        |                                                     |                                                                                                                                         |
|-----------------------------|-------------------------------------|--------|--------------|-----|-----------|------|--------|-----------------------------------------------------|-----------------------------------------------------------------------------------------------------------------------------------------|
|                             | case-control                        | Canada | 0-14         |     |           |      |        | report of medical histories for allergic conditions | at birth, mother's education and birth order                                                                                            |
| Dikalioti/2012 <sup>5</sup> | Hospital based case-control         | Greece | 0-14         | M/F | 554       | 277  | NHL HL | Guardians' report of history for allergic symptoms  | Maternal age at birth, maternal education, maternal smoking during pregnancy, breastfeeding, birth order and residential crowding index |
| Chen/2012 <sup>19</sup>     | Register-based retrospective cohort | China  | 5.9-63       | M/F | 12720     | 35   | NHL    | Medical records of urticaria                        | None                                                                                                                                    |
| Rudant/2011 <sup>2</sup>    | Population based case-control       | France | Less than 15 | M/F | 1604      | 164  | NHL    | Parental report of allergic conditions histories    | Age, gender, parental professional category, degree of urbanization, maternal age at child birth and housing, for contact with animals  |
| Koshiol/2011 <sup>10</sup>  | Prospective hospital-based cohort   | USA    | 18-100       | M   | 4 million | 9496 | NHL    | Hospital discharge diagnosis                        | Attained age, attained calendar year, race, number of hospital visits,                                                                  |

and latency  
between study entry  
and exit

|                            |                                     |                    |       |     |        |      |        |                                                                |                                                                                                         |
|----------------------------|-------------------------------------|--------------------|-------|-----|--------|------|--------|----------------------------------------------------------------|---------------------------------------------------------------------------------------------------------|
| Cerhan/2011 <sup>20</sup>  | Hospital based case-control         | USA                | Nr    | M/F | 2160   | 915  | NHL HL | Self-report of allergic conditions                             | Age, sex and residence                                                                                  |
| El-Zein/2010 <sup>21</sup> | Population-based case-control       | Canada             | 35-70 | M   | 709    | 197  | NHL    | Self-report history of medically diagnosed allergic conditions | Age, income, respondent status, ancestry, birthplace, and smoking                                       |
| Erber/2009 <sup>23</sup>   | Prospective population-based cohort | USA                | 45-75 | M/F | 193050 | 939  | NHL    | Self-report history of allergic conditions                     | Age, education, BMI, and alcohol use                                                                    |
| Pahwa/2009 <sup>22</sup>   | Population-based case-control study | Canada             | >=19  | M   | 1822   | 316  | HL     | Self-report history of allergic conditions                     | Age and province of residence                                                                           |
| Cozen/2009 <sup>24</sup>   | Population-based case-control study | USA                | <51   | M/F | 376    | 188  | HL     | Self-report history of allergic conditions                     | Age, ethnicity, sibship size, and childhood socioeconomic were matched because the study enrolled twins |
| Melbye/2007 <sup>25</sup>  | Population-based case-control       | Denmark and Sweden | 18-74 | M/F | 6242   | 3055 | NHL    | Self-report history of allergic                                | Age, sex, country, birth order, education, and                                                          |

|                                      |                                                              |                    |                                              |     |        |       |        |                                                    |                                                                                       |
|--------------------------------------|--------------------------------------------------------------|--------------------|----------------------------------------------|-----|--------|-------|--------|----------------------------------------------------|---------------------------------------------------------------------------------------|
| Melbye/2007 <sup>25</sup>            | Nested case-control with prospective population based cohort | Finland            | Nr                                           | F   | 792    | 198   | NHL    | conditions<br>Circulating IgE level                | outdoor occupation<br>None                                                            |
| Ellison-Loschmann/2007 <sup>26</sup> | Hospital based case-control                                  | Spain              | Mean:<br>Cases:<br>60.5<br>Controls<br>:58.0 | M   | 1011   | 247   | NHL HL | Circulating IgE level                              | Age, sex, center, smoking status, any treated asthma or eczema                        |
| Cozen/2007 <sup>27</sup>             | Population-based case-control                                | USA                | 20-74                                        | M/F | 2378   | 1321  | NHL    | Self-report medical history of allergic conditions | Study center, age, gender, race, and education                                        |
| Becker/2007 <sup>28</sup>            | Population and hospital based case-control                   | European countries | <=71                                         | M/F | 4827   | 2362  | NHL HL | self-reported medical history of atopic disorders  | Age, sex                                                                              |
| Soderberg/2006 <sup>29</sup>         | Population-based case-control study                          | Sweden             | Median:<br>Cases:<br>70<br>Controls<br>:67   | M/F | 169924 | 18186 | NHL    | Registry data of asthma                            | Sex, socioeconomic status and age at diagnosis (cases) or age at selection (controls) |
| Bracci/2006 <sup>30</sup>            | Population-based case-control                                | USA                | 21-74                                        | M/F | 3706   | 1304  | NHL    | Self-reported history of allergic conditions       | Age, sex                                                                              |

|                              |                                     |           |            |     |       |      |        |                                                                 |                                                        |
|------------------------------|-------------------------------------|-----------|------------|-----|-------|------|--------|-----------------------------------------------------------------|--------------------------------------------------------|
| Grulich/2005 <sup>6</sup>    | Population based case-control       | Australia | 20-74      | M/F | 1398  | 704  | NHL    | Self-reported history of allergic conditions                    | Age, sex, state and ethnicity                          |
| Eriksson/2005 <sup>31</sup>  | Prospective hospital based cohort   | Sweden    | Median: 32 | M/F | 13811 | 8    | NHL    | Skin prick test result                                          | None                                                   |
| Becker/2005 <sup>32</sup>    | Population-based case-control       | Germany   | 18-80      | M/F | 1414  | 704  | NHL HL | Self-reported medical history of atopic disorders               | Smoking                                                |
| Zhang/2004 <sup>33</sup>     | Population-based case-control       | USA       | 21-84      | F   | 1318  | 601  | NHL    | Self-reported history of allergic conditions                    | Age, BMI, menopausal status, and family history of NHL |
| Soderberg/2004 <sup>34</sup> | Prospective population based cohort | Sweden    | Median: 56 | M/F | 16539 | 112  | NHL    | Self-reported history of allergic conditions                    | Age, sex                                               |
| Holly/2003 <sup>35</sup>     | Population-based case-control       | USA       | Nr         | M/F | 3706  | 1304 | NHL    | Medical records or self-reported history of allergic conditions | Age, sex                                               |
| Briggs/2002 <sup>36</sup>    | Population based case-control       | USA       | 32-60      | M   | 2643  | 952  | NHL    | Self-reported medical history of allergy                        | Age, cancer registry, ethnicity, and education         |

|                                     |                                           |         |             |     |       |      |        |                                                                                |                                                                |
|-------------------------------------|-------------------------------------------|---------|-------------|-----|-------|------|--------|--------------------------------------------------------------------------------|----------------------------------------------------------------|
| Fabbro-Peray/<br>2001 <sup>37</sup> | Population-based<br>case-control          | France  | >=18        | M/F | 1470  | 445  | NHL    | Self-reported<br>history of<br>allergic<br>conditions                          | Age, sex, ethnicity,<br>education, setting<br>(rural or urban) |
| Vineis/2000 <sup>38</sup>           | Population-based<br>case-control          | Italy   | 20-74       | M/F | 4387  | 1742 | NHL HL | Self-reported<br>history of<br>allergic<br>conditions                          | Age, sex                                                       |
| Holly/1999 <sup>39</sup>            | Population-based<br>case-control          | USA     | 21-74       | M/F | 3376  | 1281 | NHL    | Medical<br>records or<br>self-reported<br>history of<br>allergic<br>conditions | Age                                                            |
| Vesterinen/1993 <sup>40</sup>       | Prospective<br>population based<br>cohort | Finland | 35-84       | M/F | 78000 | 65   | NHL    | Medical<br>information<br>of asthma<br>diagnosis                               | None                                                           |
| La Vecchia/1992 <sup>41</sup>       | Hospital based<br>case-control            | Italy   | 17-79       | M/F | 738   | 177  | NHL    | Self-reported<br>history of<br>allergic<br>conditions                          | Age, sex                                                       |
| Doody/1992 <sup>42</sup>            | Hospital based<br>case-control            | USA     | >=15        | M/F | 291   | 100  | NHL    | Medical<br>records of<br>allergic<br>conditions                                | None                                                           |
| Bernstein/1992 <sup>43</sup>        | Population-based<br>case-control          | USA     | Mean:<br>57 | M/F | 1238  | 619  | NHL    | Self-reported<br>medical<br>history of<br>allergic                             | None                                                           |

|                               |                                   |       |       |     |      |     |     |                                                                    |          |
|-------------------------------|-----------------------------------|-------|-------|-----|------|-----|-----|--------------------------------------------------------------------|----------|
| Franceschi/1989 <sup>44</sup> | Hospital based case-control study | Italy | 17-80 | M/F | 609  | 208 | NHL | conditions<br>Self-reported medical history of allergic conditions | Age, sex |
| Cartwright/1988 <sup>45</sup> | Hospital based case-control study | UK    | Nr    | M/F | 1161 | 437 | NHL | Self-reported medical history of allergic conditions               | None     |
| Tielsch/1987 <sup>46</sup>    | Hospital based case-control study | USA   | >=18  | M/F | 218  | 109 | NHL | Self-reported medical history of allergic conditions               | Nr       |

Nr: not reported; NHL: non-hodgkin lymphoma; HL: hodgkin lymphoma; BMI: body mass index;
